# Supplementary material for: Novel aza-BODIPY based small molecular NIR-II fluorophores for in vivo imaging
Source: Royal Society of Chemistry journal article supplement (doi:10.1039/c9cc03378e), 2019-01-01
Supplement: c9cc03378e1.pdf [file c9cc03378e1.pdf]

## Supporting Information

# Novel Aza-BODIPY based Small Molecular NIR-II Fluorophores for *in vivo* Imaging

Lei Bai,<sup>a,†</sup> Pengfei Sun,<sup>b,†</sup> Yi Liu,<sup>a,†</sup> Hang Zhang,<sup>a</sup> Wenbo Hu,<sup>a</sup> Wansu Zhang,<sup>b</sup> Zhipeng Liu,<sup>a,\*</sup> Quli Fan,<sup>b,\*</sup> Lin Li<sup>a,\*</sup> and Wei Huang<sup>a,b,c</sup>

<sup>a</sup>Key Laboratory of Flexible Electronics (KLOFE) & Institute of Advanced Materials (IAM), Nanjing Tech University (NanjingTech), Nanjing 211816, China. [iamlii@njtech.edu.cn](mailto:iamlii@njtech.edu.cn); [iamzpliu@njtech.edu.cn](mailto:iamzpliu@njtech.edu.cn)

<sup>b</sup>Key Laboratory for Organic Electronics and Information Displays & Institute of Advanced Materials (IAM), Nanjing University of Posts & Telecommunications, Nanjing 210023, China. [iamqlfan@njupt.edu.cn](mailto:iamqlfan@njupt.edu.cn).

<sup>c</sup>Shaanxi Institute of Flexible Electronics (SIFE), Northwestern Polytechnical University, 127 West Youyi Road, Xi'an 710072, China

## 1. Materials and characterization

All the chemical reagents were purchased from Aldrich or TCI. Commercially available reagents were used without further purification. *N,N*-Dimethylformamide (DMF), 1, 2-dichloroethane (DCE) and dichloromethane (CH<sub>2</sub>Cl<sub>2</sub>, DCM) were distilled over CaH<sub>2</sub>. Petroleum ether (PE, 60~90°C), DCM, Ethyl acetate (EA) and Methanol (MeOH) were used as eluents for Flash column chromatography with Merck silica gel (0.040-0.063). Reaction progress was monitored by TLC on pre-coated silica plates (250 μm thickness) and spots were visualized by ceric ammonium molybdate, basic KMnO<sub>4</sub>, UV light or iodine. Reaction progress was monitored by TLC on pre-coated silica plates (250 μm thickness) and spots were visualized by UV light or iodine. All reactions were carried out under a dry nitrogen protection. Silica gel 60 (200-300 mesh, Silicycle) was used for column chromatography. All reagents and solvents were purchased from commercial suppliers and used without further purification. <sup>1</sup>H and <sup>13</sup>C NMR spectra were collected in CDCl<sub>3</sub> or DMSO-*d*<sub>6</sub> at 25°C using an Avance AV-300 spectrometer. <sup>1</sup>H NMR coupling constants (*J*) are reported in Hertz (Hz) and multiplicity is indicated as follows: s (singlet), d (doublet), t (triplet), q (quartet), m (multiplet), dd (doublet of doublet). Mass spectra were recorded on a Finnigan LCQ mass spectrometer, a Shimadzu LC-IT-TOF spectrometer.

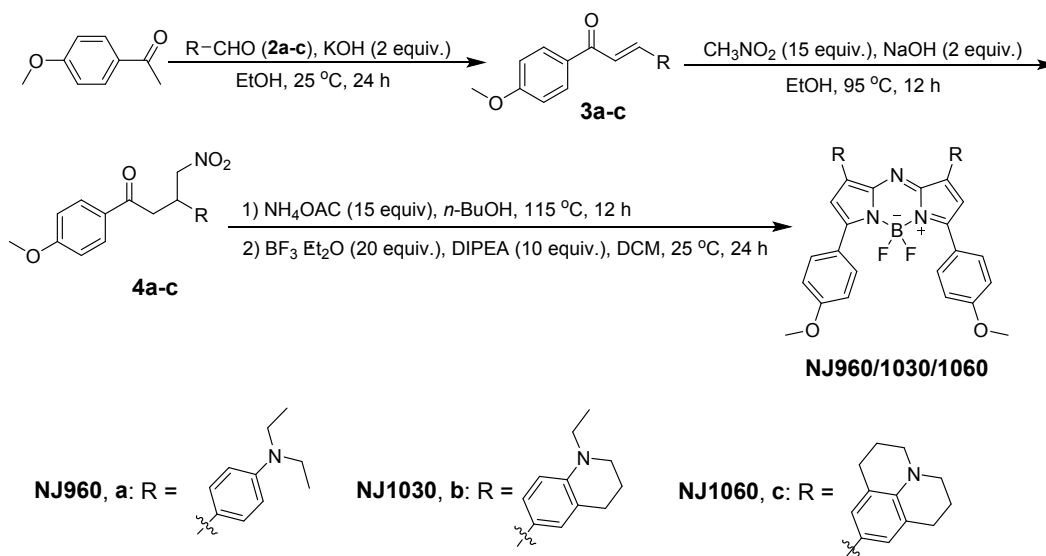

**Scheme S1.** The synthesis of **NJ960**, **NJ1030** and **NJ1060**.

## 2. Synthesis and characterization:

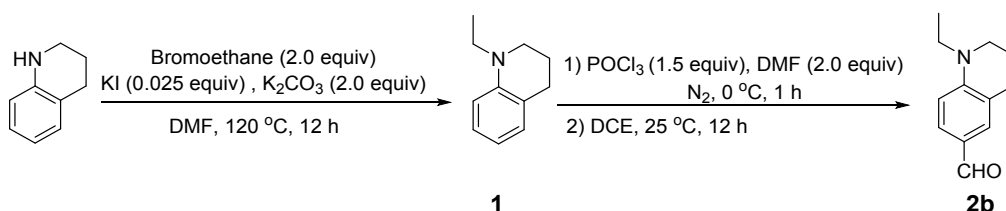

Synthesis of **2b**: Under a N<sub>2</sub> atmosphere, anhydrous potassium carbonate (276.42 mg, 2 mmol) and potassium iodide (415 mg, 0.025 mmol) were added to a solution of 1,2,3,4-tetrahydroquinoline (133.2 mg, 30 mmol) and C<sub>2</sub>H<sub>5</sub>Br (217 mg, 2 mmol, 0.149 mL) in DMF (20 mL). The mixture was stirred at 120 °C for 12 h, and then poured into water and organic phase was extracted by EA, The combined organic fractions were dried over anhydrous Na<sub>2</sub>SO<sub>4</sub>, filtered and concentrated to afford the crude residue which was purified *via* flash chromatography on a silica column (10 : 1 v/v PE: EA) to afford the compound as a yellow oil (**1**, yield: 85%). <sup>1</sup>H NMR (CDCl<sub>3</sub>) δ/ppm 7.06 (m, 1H), 6.95 (m, 1H), 6.60 (m, 2H), 3.33 (m, 4H), 2.77 (t, *J* = 6.0, 2H), 1.89 (m, 2H), 1.12 (t, *J* = 7.5, 3H). Then, DMF (0.93 mL, 12.4 mmol, 2.0 equiv.) was added to freshly distilled POCl<sub>3</sub> (1.42 g, 9.3 mmol, 1.5 equiv.) under an atmosphere of N<sub>2</sub> at 0 °C and the mixture was stirred at room temperature for 1 h. After the addition of **1** (1.0 g, 6.2 mmol) in DCE (10 mL) dropwise, the mixture was stirred at room temperature overnight, then poured into a saturation aqueous solution of NaHCO<sub>3</sub>. After 2 h stirring at room temperature, the mixture was extracted with EA, and the organic fractions were collected and dried over anhydrous Na<sub>2</sub>SO<sub>4</sub>. The crude product was purified by silica gel chromatography eluting with (PE : EA = 10 : 1) to afford a yellow oil. (80% yield). <sup>1</sup>H NMR (CDCl<sub>3</sub>) δ/ppm 9.64 (s, 1H), 7.52 (d, *J* = 9.0, 1H), 7.44 (s, 1H), 6.60 (d, *J* = 9.0, 1H), 3.38 (m, 4H), 2.77 (t, *J* = 6.0, 2H), 1.93 (m, 2H), 1.21 (t, *J* = 7.5, 3H).

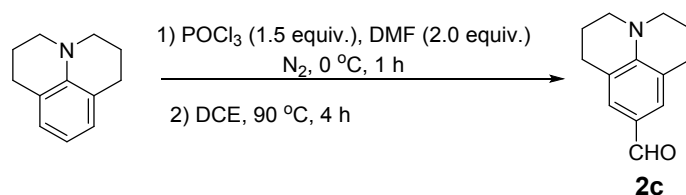

Synthesis of **2c**: The compound was synthesized according to the similar procedure described above in **2b** by using julolidine to afford **2c** (yield: 90%) as a light yellow solid. <sup>1</sup>H NMR (300 MHz, CDCl<sub>3</sub>) δ/ppm 9.59 (s, 1H), 7.28 (s, 2H), 3.28 (t, *J* = 6.0, 4H), 2.76 (t, *J* = 6.0, 4H), 1.95 (m, 4H).

Synthesis of compound **3a-c**: A solution of **2a-c** (1.0 equiv., **2a** is commercial available compound), *p*-acetylanisole (1.0 equiv.), in EtOH (60 mL) was treated with NaOH (20% w/w in H<sub>2</sub>O, 15 mL) and stirred at room temperature for 24 h. MeOH was removed under reduced pressure and the resultant aqueous solution was diluted with brine and extracted with EA. The combined organic fractions were dried over anhydrous Na<sub>2</sub>SO<sub>4</sub>, filtered and concentrated to afford the crude residue which was purified *via* flash chromatography on a silica column (15 : 1 v/v PE : EA) to afford the compounds as red solid.

**3a** (yield: 81%): <sup>1</sup>H NMR (300 MHz, CDCl<sub>3</sub>) δ/ppm 8.01 (d, *J* = 9.0 Hz, 2H), 7.75 (d, *J* = 15.0 Hz, 1H), 7.54 (d, *J* = 9.0 Hz, 2H), 7.35 (d, *J* = 15.0 Hz, 1H), 6.98 (d, *J* = 9.0 Hz, 2H), 6.67 (d, *J* = 9.0 Hz, 2H), 3.88 (s, 3H), 3.42 (dd, *J*<sub>1</sub> = 15.0 Hz, *J*<sub>2</sub> = 9.0 Hz, 4H), 1.20 (t, *J* = 6.0 Hz, 6H). <sup>13</sup>C NMR (75 MHz, CDCl<sub>3</sub>) δ/ppm

188.97, 162.94, 149.60, 145.06, 132.06, 130.61, 122.11, 116.19, 113.68, 111.34, 55.37, 44.52, 12.48.

**3b** (yield: 90%): <sup>1</sup>H NMR (300 MHz, CDCl<sub>3</sub>) δ/ppm 8.03 (d, *J* = 9.0 Hz, 2H), 7.76 (d, *J* = 15.0 Hz, 1H), 7.33 (m, 3H), 6.98 (d, *J* = 6.0 Hz, 2H), 6.58 (d, *J* = 9.0 Hz, 1H), 3.87 (s, 3H), 3.37 (m, 4H), 2.77 (t, *J* = 6.0 Hz, 2H), 1.96 (m, 2H), 1.17 (t, *J* = 6.0, 3H). <sup>13</sup>C NMR (75 MHz, CDCl<sub>3</sub>) δ/ppm 188.93, 162.90, 147.29, 145.29, 132.35, 130.50, 129.44, 122.31, 122.14, 115.88, 113.66, 110.07, 55.45, 48.64, 45.44, 28.15, 21.93, 11.12.

**3c** (yield: 80%): <sup>1</sup>H NMR (300 MHz, CDCl<sub>3</sub>) δ/ppm 8.01 (d, *J* = 9.0 Hz, 2H), 7.73 (d, *J* = 15.0 Hz, 1H), 7.31 (d, *J* = 8.0 Hz, 1H), 7.11 (s, 2H), 6.98 (d, *J* = 6.0 Hz, 2H), 3.88 (s, 3H), 3.25 (t, *J* = 4.5 Hz, 4H), 2.79 (t, *J* = 6.0 Hz, 4H), 1.97 (m, 4H). <sup>13</sup>C NMR (75 MHz, CDCl<sub>3</sub>) δ/ppm 188.87, 162.86, 145.48, 145.13, 132.20, 130.73, 130.48, 128.04, 121.91, 121.05, 115.67, 114.05, 113.64, 55.45, 50.00, 27.74, 21.66.

Synthesis of compounds **4a-c**: To a stirred solution of **3a-c** (1.0 equiv.) in EtOH (10 mL) was added MeNO<sub>2</sub> (15 equiv.) and NaOH (20% w/w in H<sub>2</sub>O, 80.0 μL). The reaction was refluxed for 24 h. EtOH was removed with reduced pressure and the resultant aqueous solution was diluted with brine (20 mL) and extracted with EA. The combined organic fractions were anhydrous Na<sub>2</sub>SO<sub>4</sub>, filtered and concentrated to afford the crude residue which was purified *via* flash chromatography on a silica column (10 : 1 v/v PE : EA) to afford the title compounds as tan oil.

**4a** (yield: 60%): <sup>1</sup>H NMR (300 MHz, CDCl<sub>3</sub>) δ/ppm 7.89 (d, *J* = 9.0 Hz, 2H), 7.10 (d, *J* = 9.0 Hz, 2H), 6.93 (d, *J* = 9.0 Hz, 2H), 6.62 (d, *J* = 9.0 Hz, 2H), 4.77 (m, 1H), 4.63 (m, 1H), 4.08 (m, 1H), 3.88 (s, 3H), 3.66 (m, 8H), 1.13 (t, *J* = 7.5 Hz, 6H). <sup>13</sup>C NMR (75 MHz, CDCl<sub>3</sub>) δ/ppm 195.91, 163.76, 147.35, 130.39, 129.78, 128.29, 125.45, 113.86, 112.02, 80.13, 55.51, 44.29, 41.57, 38.78.

**4b** (yield: 65%): <sup>1</sup>H NMR (300 MHz, CDCl<sub>3</sub>) δ/ppm 7.89 (d, *J* = 9.0 Hz, 2H), 6.90 (m, 4H), 6.49 (d, *J* = 15.0 Hz, 1H), 4.76 (m, 1H), 4.60 (m, 1H), 4.03 (m, 1H), 3.86 (s, 3H), 3.28 (m, 6H), 2.70 (t, *J* = 6.0, 2H), 1.92 (m, 2H), 1.11 (t, *J* = 7.5, 3H). <sup>13</sup>C NMR (75 MHz, CDCl<sub>3</sub>) δ/ppm 196.04, 163.76, 139.86, 130.43, 124.74, 121.84, 113.87, 80.13, 58.51, 55.54, 49.91, 41.67, 38.85, 30.38, 27.71, 22.02, 18.40.

**4c** (yield: 60%): <sup>1</sup>H NMR (300 MHz, CDCl<sub>3</sub>) δ/ppm 7.92 (d, *J* = 9.0 Hz, 2H), 6.93 (d, *J* = 9.0 Hz, 2H), 6.64 (s, 2H), 4.74 (m, 1H), 4.59 (m, 1H), 1.93 (m, 4H). <sup>13</sup>C NMR (75 MHz, CDCl<sub>3</sub>) δ/ppm 195.82, 163.76, 139.86, 130.43, 125.85, 121.84, 114.69, 113.87, 80.13, 58.51, 55.54, 49.96, 41.67, 38.85, 27.71, 22.02.

Synthesis of **NJ960**: A solution of **4a** (1.0 equiv.) was dissolved in *n*-butanol (20 mL). Ammonium acetate (15.0 equiv.) was added and the reaction was stirred at 115 °C for 12 h. The reaction was cooled to room temperature and the solvent was concentrated to 5 mL and filtered, and the isolated solid washed

with ethanol (2 × 5 mL) to afford the title compound as a dark blue film. And the solution of dark blue film (1.0 equiv.) in anhydrous DCM (15 mL) was treated with anhydrous DIPEA (10.0 equiv.) and boron trifluoride etherate (15.0 equiv.), and stirred at room temperature under N<sub>2</sub> for 24 h. The solution was diluted with water (20 mL) and extracted with DCM. The combined organic fractions were dried anhydrous Na<sub>2</sub>SO<sub>4</sub>, filtered and concentrated to afford the crude residue which was purified via flash chromatography on a silica column (1 : 1 v/v PE : DCM) to afford **NJ960** as a metallic brown solid (yield: 90%). <sup>1</sup>H NMR (300 MHz, CDCl<sub>3</sub>) δ/ppm 8.06 (t, *J* = 7.5 Hz, 8H), 7.00 (d, *J* = 9.0 Hz, 6H), 6.75 (d, *J* = 11.5 Hz, 6H), 3.87 (s, 6H), 3.47 (dd, *J*<sub>1</sub> = 15.0 Hz, *J*<sub>2</sub> = 6.0 Hz, 8H), 1.24 (t, *J* = 7.5 Hz, 12H). <sup>13</sup>C NMR (75 MHz, CDCl<sub>3</sub>) δ/ppm 161.2, 156.7, 148.4, 145.2, 145.0, 131.1, 125.2, 120.6, 114.3, 114.0, 111.4, 55.3, 44.6, 12.7. HRMS calcd for C<sub>42</sub>H<sub>45</sub>BF<sub>2</sub>N<sub>5</sub>O<sub>2</sub> [M+H]<sup>+</sup>: 700.3634; found: 700.3662.

Synthesis of **NJ1030**: The compound was synthesized according to the similar procedure described above in **NJ960** by using **4b** to afford **NJ1030** (yield: 90%) as a metallic brown solid. <sup>1</sup>H NMR (300 MHz, CDCl<sub>3</sub>) δ/ppm 8.0 (m, 6H), 7.79 (s, 2H), 6.98 (d, *J* = 15.0 Hz, 4H), 6.77 (t, *J* = 9.0, 6H), 5.30 (s, 1H), 3.86 (s, 6H), 3.65 (m, 1H), 3.42 (s, 7H), 3.10 (m, 1H), 2.84 (s, 3H), 2.02 (m, 4H), 1.22 (t, *J* = 7.5, 6H). <sup>13</sup>C NMR (75 MHz, CDCl<sub>3</sub>) δ/ppm 161.1, 156.5, 147.2, 145.7, 145.2, 142.7, 131.1, 130.2, 129.4, 125.2, 122.7, 114.3, 113.9, 110.9, 55.3, 48.8, 45.9, 28.2, 21.9, 11.2. HRMS calcd for C<sub>44</sub>H<sub>45</sub>BF<sub>2</sub>N<sub>5</sub>O<sub>2</sub> [M+H]<sup>+</sup>: 724.3634; found: 724.3623.

Synthesis of **NJ1060**: The compound was synthesized according to the similar procedure described above in **NJ960** by using **4c** to afford **NJ1060** (yield: 90%) as a metallic brown solid. <sup>1</sup>H NMR (300 MHz, CDCl<sub>3</sub>) δ/ppm 8.02 (d, *J* = 12.0 Hz, 4H), 7.59 (s, 6H), 6.97 (d, *J* = 12.0 Hz, 4H), 6.72 (s, 2H), 3.86 (s, 6H), 3.27 (s, 4H), 2.77 (m, 4H), 2.01 (m, 4H). <sup>13</sup>C NMR (75 MHz, CDCl<sub>3</sub>) δ/ppm 161.2, 156.7, 148.4, 145.2, 145.0, 131.1, 125.2, 120.6, 114.3, 114.0, 111.4, 55.3, 44.6, 12.7. HRMS calcd for C<sub>46</sub>H<sub>45</sub>BF<sub>2</sub>N<sub>5</sub>O<sub>2</sub> [M+H]<sup>+</sup>: 748.3634; found: 748.3635.

### 3. Theoretical calculations

All the calculations were based on density functional theory (DFT) with B3LYP functional and 6-31G(d) basis set. Solvent (water) was considered in all the calculations. The UV-vis absorptions of the compounds (vertical excitation) were calculated with the TDDFT methods based on the optimized ground state geometry (S<sub>0</sub> state). For the fluorescence emission, the emission wavelength was calculated based on the optimized excited states (S<sub>1</sub> state). All these calculations were performed with Gaussian 09W.

### 4. Spectral characterization

Absorption spectra were recorded using SynergyHTX microplate reader. Emission spectra were recorded using an Edinburgh FLSP920 fluorescence spectrophotometer equipped with a picosecond pulsed semiconductor light (EPL375) and a microsecond flash-lamp (UF900). TEM images were taken on a JEOL-2100F at an acceleration voltage of 200 kV.

## 5. Measuring quantum yield.

The quantum yield of the probe was determined according the formula:

$$\Phi_x = \Phi_{st} \left( \frac{S_x}{S_{st}} \right) \left( \frac{A_{st}}{A_x} \right) \left( \frac{n_x^2}{n_{st}^2} \right)$$

to where  $\Phi_{st}$  is the quantum yield of the standard, S is the area under the emission spectra, A is the absorbance at the excitation wavelength, and n is the refractive index of the solvent used. x subscript denotes unknown, and st means standard. **IR26** ( $\Phi_f = 0.1$  in DCM) was chosen as the standard.

## 6. Photostability

The photo-stability of **NJ960**, **NJ1030**, **NJ1060** and **IR1061** (Sigma-Aldrich, CAS: 155614-01-0) were investigated in PBS solution containing 20% DMSO as co-solvent with concentration of 10  $\mu$ M, The respective dye's solution in 1cm quartz cuvettes (200  $\mu$ L) was illuminated with a continuous laser (808 nm, 100 mW/cm<sup>2</sup>) for 60 min. the emission intensity of **NJ960**, **NJ1030**, **NJ1060** and **IR1061** was measured every 1 min.

## 7. The preparation of NJ1060 NPS

**NJ1060** was be made to Water-soluble Nanoparticles (NPs) with Pluronic F-127 for *in vivo* imaging. **NJ1060** (2 mg) were dissolved in THF (1 mL) by bath sonication. Then, a mixed THF solution (1 mL) and Pluronic F-127 (10 mg/mL) were used to prepare **NJ1060** NPs by rapidly injecting the mixture into distilled-deionized water (9 mL) under continuous sonication with a microtip-equipped probe sonicator for 2 min. After sonication, THF was evaporated at room temperature. The aqueous solution washed three times using a centrifugal filter under centrifugation at 1500 rpm for 30 min. The concentration of **NJ1060** NPs solutions were determined by UV-Vis absorption according to their absorption coefficients.

## 8. Chicken penetration model assay (NJ1060 NPs)

**NJ1060** NPs (0.1 mg/mL) was filled in a plastic hose (length: 2 cm, diameter: 2 mm). Then, the plastic hose was put on the surface of prepared

nuggets and taken for imaging. The depths of penetration was tested through changing the different thickness (0, 1, 2, 4, 6, 8 and 10 mm) of chicken meat and detecting the varied fluorescence intensity of **NJ1060** NPs in the hose.

## 9. Cell culture and cytotoxicity activity assay

HepG2 cells were cultured in Dulbecco's Modified Eagle's Medium (DMEM), containing 10% FBS, 100.0 mg/L streptomycin, and 100 IU/mL penicillin. HepG2 cells were seeded in glass-bottom dishes (Mattek) and grown to 70-80% con-fluency. The cytotoxicity activities of the probes were determined using an XTT colorimetric cell proliferation kit (Roche), following the manufacturer guidelines. Briefly, cells were grown to 20-30% confluency (they would reach 80-90% confluency within 48-72 h in the absence of compounds) in 96-well plates under the conditions described above. The medium was aspirated, washed with PBS, and then treated, in duplicate, with 0.1 mL of the medium containing different concentrations of **NJ1060** NPs (0-400  $\mu\text{g}/\text{mL}$ ). Staurosporine (STS, 200 nM) was used as a positive control. After a total treatment time for 24 h, proliferation was assayed using the XTT colorimetric cell proliferation kit (Roche), following manufacturer guidelines

## 10. Animal handling

All mice were purchased from Jiangsu KeyGEN BioTECH Corp., Ltd. and used according to the guidelines of the Laboratory Animal Center of Jiangsu KeyGEN BioTECH Corp., Ltd. Two groups of mice were generated by intravenously injecting **ICG** (200  $\mu\text{L}$ , 2.0 mg/mL) and **IR1061** (200  $\mu\text{L}$ , 2.0 mg/mL), respectively, as control; another group was generated by intravenously injecting **NJ1060** NPs (200  $\mu\text{L}$ , 2.0 mg/mL). And then, three groups were fluorescence imaging for the right hind leg and brain, respectively. The animals with tumors (4t1) were also used for experiments. The animal was generated by intravenously injecting **NJ1060** NPs (200  $\mu\text{L}$ , 2.0 mg/mL) and it was taken for fluorescence imaging for different times (1, 3, 6, 12 and 24 h) to observe the fluorescence of the tumor position.

## 11. NIR-II imaging

The real-time in vivo NIR-II Imaging was performed at intravenous injection by using a home built NIR-II spectroscopy set-up in the 900-1500 nm region. The excitation wavelength was an 808 nm semiconductor laser at 200 mW output of power. Excitation at 808 nm was deliberately used to balance absorption and scattering to obtain maximum penetration depth of excitation light for in vivo imaging. Emissions were acquired in the transmission geometry with a 975 nm long pass filter (ScmRock) to prevent the excitation light. The emitted fluorescence from the sample was directed into a spectrometer (Acton SP2300i) equipped with an InGaAs linear array detector (Princeton OMA-V).

**Table S1.** Chemical structures and photophysical properties of reported NIR-II small molecule dyes from literatures.

| Types                                                                               | NIR-II dyes                   | Chemical structure                                                                                                                       |
|-------------------------------------------------------------------------------------|-------------------------------|------------------------------------------------------------------------------------------------------------------------------------------|
| 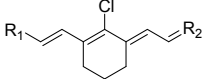   | <b>IR1048</b> <sup>[1]</sup>  | <br>Em=1048 and $\Phi_f\%$ =0.4 in DCM                 |
|                                                                                     | <b>IR1061</b> <sup>[1]</sup>  | <br>Em=1061 and $\Phi_f\%$ =1.7 in DCM                 |
|                                                                                     | <b>IR1026</b> <sup>[2]</sup>  | <br>Em=1026 and $\Phi_f\%$ =0.5 in DCM                 |
|                                                                                     | <b>FD-1080</b> <sup>[3]</sup> | <br>Em=1048 and $\Phi_f\%$ =0.4 in H <sub>2</sub> O   |
|                                                                                     | <b>IR 1100</b> <sup>[2]</sup> | <br>Em=1100 and $\Phi_f\%$ =N in DCM                 |
|                                                                                     | <b>IR 26</b> <sup>[4]</sup>   | <br>Em=1130 and $\Phi_f\%$ =0.1 in DCE               |
|  | <b>IR-FGP</b> <sup>[5]</sup>  | <br>Em=1045 and $\Phi_f\%$ =1.91 in H <sub>2</sub> O |
|                                                                                     | <b>CH1055</b> <sup>[6]</sup>  | <br>Em=1055 and $\Phi_f\%$ =0.3 in H <sub>2</sub> O  |



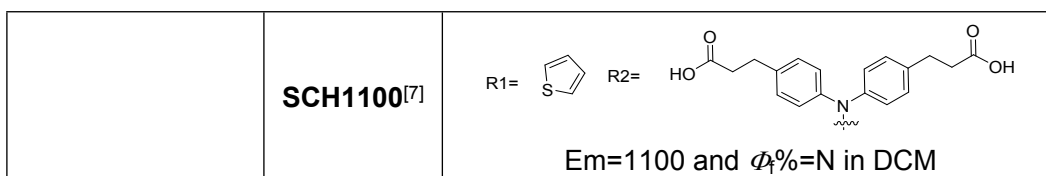

**Table S2.** Calculated electronic excitation energies, oscillator strengths, and related wave functions.

| Dye                   | State <sup>[a]</sup>                 | TDDFT//B3LYP/6-31G(d) |                |                    |                                          |                   |
|-----------------------|--------------------------------------|-----------------------|----------------|--------------------|------------------------------------------|-------------------|
|                       |                                      | Energy[eV]            | $\lambda$ [nm] | $f$ <sup>[d]</sup> | Orbitals<br>(coefficient) <sup>[e]</sup> | CI <sup>[f]</sup> |
| <b>NJ960</b>          | $S_0 \rightarrow S_1$ <sup>[b]</sup> | 1.6043                | 773            | 0.5256             | H-L                                      | 0.69750           |
|                       |                                      |                       |                |                    | H-2-L                                    | -0.13999          |
|                       | $S_0 \rightarrow S_2$                | 1.9345                | 641            | 0.6882             | H-1-L                                    | 0.70468           |
|                       | $S_1 \rightarrow S_0$                | 1.3624                | 910            | 0.7328             | H-L                                      | 0.70727           |
|                       | $S_0 \rightarrow S_1$ <sup>[c]</sup> | 1.6351                | 758            | 0.4831             | H-L                                      | 0.69455           |
|                       |                                      |                       |                |                    | H-2-L                                    | -0.15676          |
| <b>NJ1030</b>         | $S_0 \rightarrow S_2$                | 1.9577                | 633            | 0.6383             | H-1-L                                    | 0.70452           |
|                       | $S_1 \rightarrow S_0$                | 1.3631                | 909            | 0.7324             | H-L                                      | 0.70726           |
|                       | $S_0 \rightarrow S_1$ <sup>[b]</sup> | 1.5578                | 796            | 0.4989             | H-L                                      | 0.70112           |
|                       |                                      |                       |                |                    | H-2-L                                    | -0.12156          |
|                       |                                      |                       |                |                    | H-1-L                                    | 0.70439           |
|                       | $S_0 \rightarrow S_2$                | 1.9189                | 646            | 0.6726             | H-1-L                                    | 0.70439           |
|                       | $S_1 \rightarrow S_0$                | 1.4149                | 876            | 0.7157             | H-L                                      | 0.70681           |
|                       | $S_0 \rightarrow S_1$ <sup>[c]</sup> | 1.5874                | 781            | 0.4583             | H-L                                      | 0.69901           |
|                       |                                      |                       |                |                    | H-2-L                                    | 0.13646           |
|                       | $S_0 \rightarrow S_2$                | 1.9422                | 638            | 0.6212             | H-1-L                                    | 0.70415           |
|                       | $S_1 \rightarrow S_0$                | 1.4157                | 875            | 0.7152             | H-L                                      | 0.70680           |
|                       | $S_0 \rightarrow S_1$ <sup>[b]</sup> | 1.5060                | 823            | 0.5070             | H-L                                      | 0.70596           |
| $S_0 \rightarrow S_2$ | 1.8622                               | 666                   | 0.6920         | H-1-L              | 0.70495                                  |                   |
| $S_1 \rightarrow S_0$ | 1.2654                               | 980                   | 0.7298         | H-L                | 0.70927                                  |                   |
| <b>NJ1060</b>         | $S_0 \rightarrow S_1$ <sup>[c]</sup> | 1.5371                | 806            | 0.4688             | H-L                                      | 0.70494           |
|                       |                                      |                       |                |                    | H-2-L                                    | 0.11000           |
|                       | $S_0 \rightarrow S_2$                | 1.8873                | 656            | 0.6386             | H-1-L                                    | 0.70479           |
|                       | $S_1 \rightarrow S_0$                | 1.2662                | 979            | 0.7289             | H-L                                      | -0.70926          |

[a] Only selected excited state were considered. [b] Water was employed as the solvent for the DFT calculations. [c] Water containing 20% DMSO (v:v) was employed as the solvent for the DFT calculations. [d] Oscillator strength. [e] MOs involved in the transitions. H = HOMO; L = LUMO. [f] Coefficient of the wavefunction for each excitations. The CI coefficients are in absolute values.

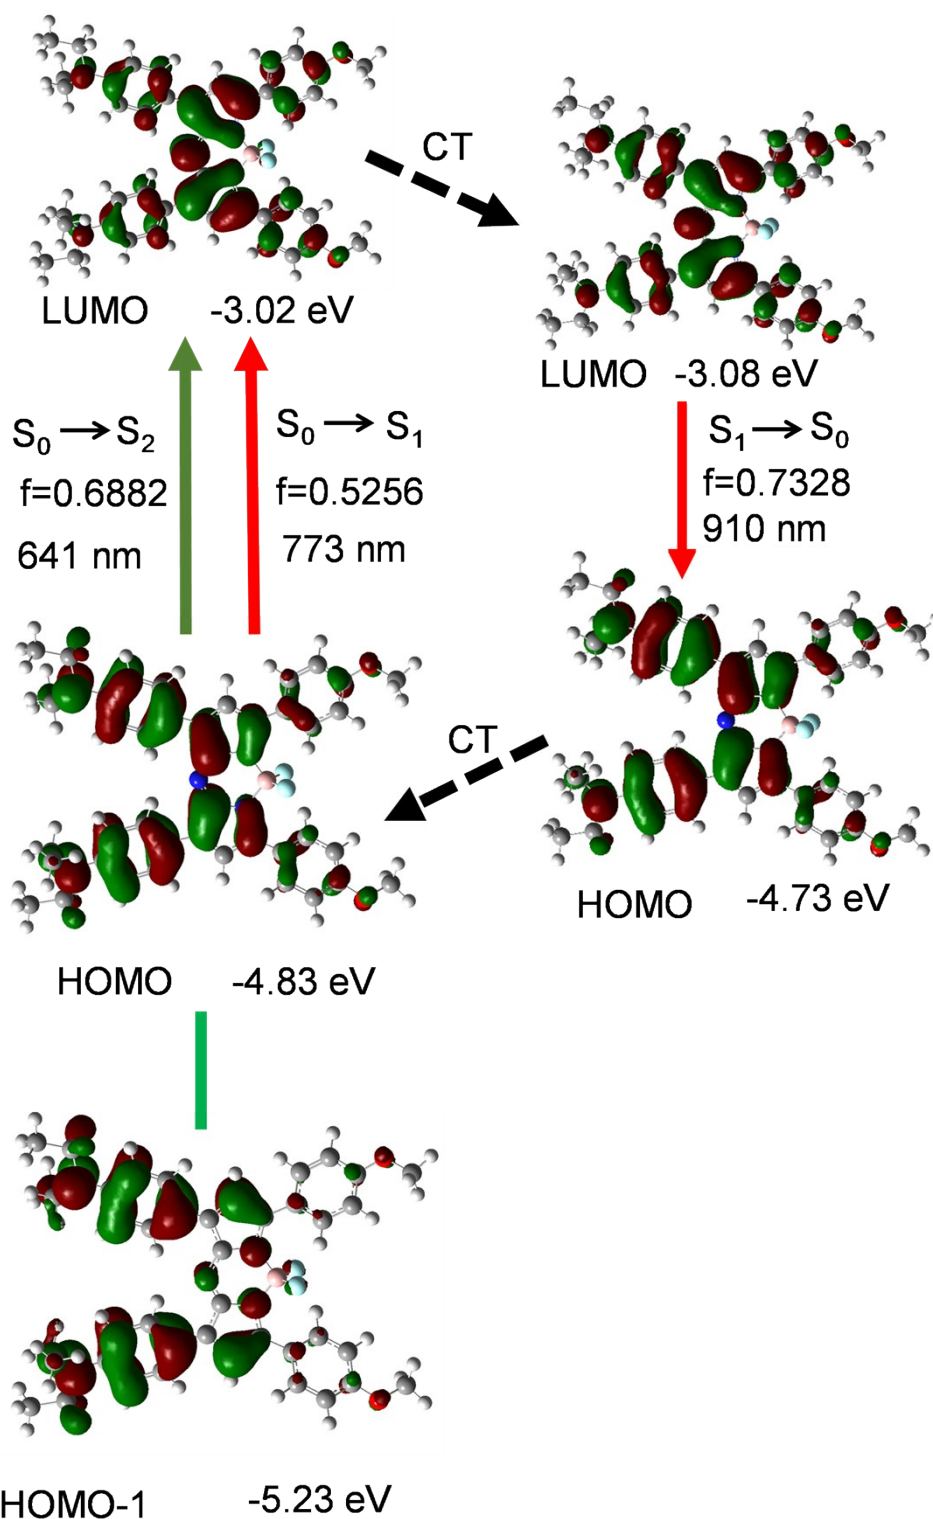

**Figure S1.** The frontier molecular orbitals (MOs) involved in the vertical excitation (UV-vis absorption) and emission of **NJ960**. Water was employed as the solvent for the DFT calculations. The vertical excitation related calculations are based on the optimized ground state geometry ( $S_0$  state), the emission related calculations were based on the optimized excited state ( $S_1$  state), at the B3LYP/6-31G(d)/level using Gaussian 09W. CT stands for conformation transformation. Excitation and radiative processes are marked as solid lines and the non-radiative processes are marked by dotted lines.

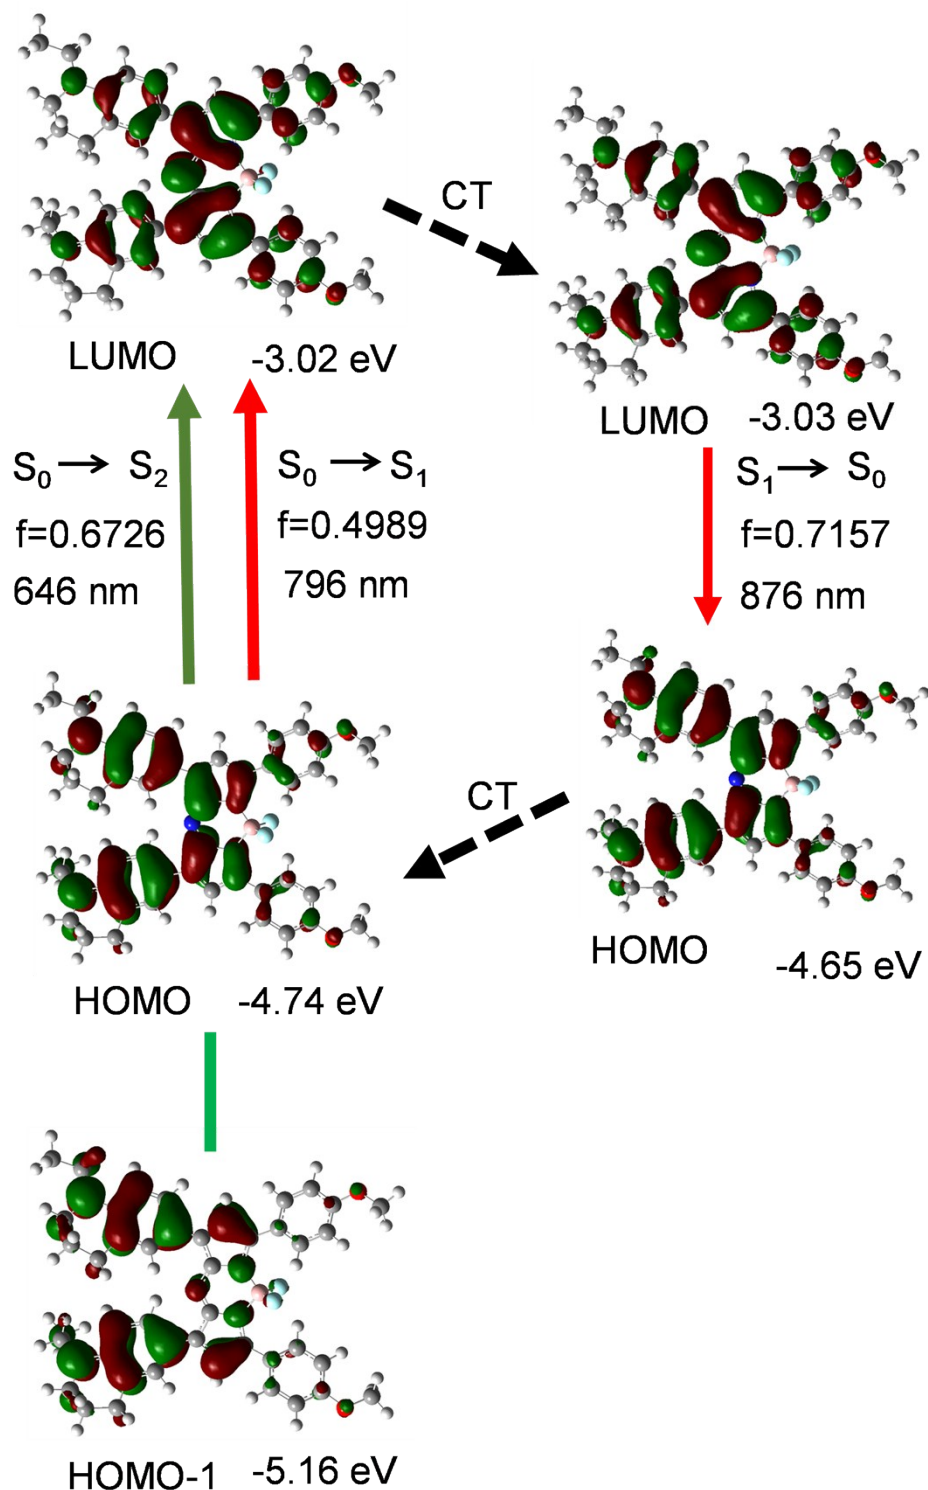

**Figure S2.** The frontier molecular orbitals (MOs) involved in the vertical excitation (UV-vis absorption) and emission of **NJ1030**. Water was employed as the solvent for the DFT calculations. The vertical excitation related calculations are based on the optimized ground state geometry ( $S_0$  state), the emission related calculations were based on the optimized excited state ( $S_1$  state), at the B3LYP/6-31G(d)/level using Gaussian 09W. CT stands for conformation transformation. Excitation and radiative processes are marked as solid lines and the non-radiative processes are marked by dotted lines.

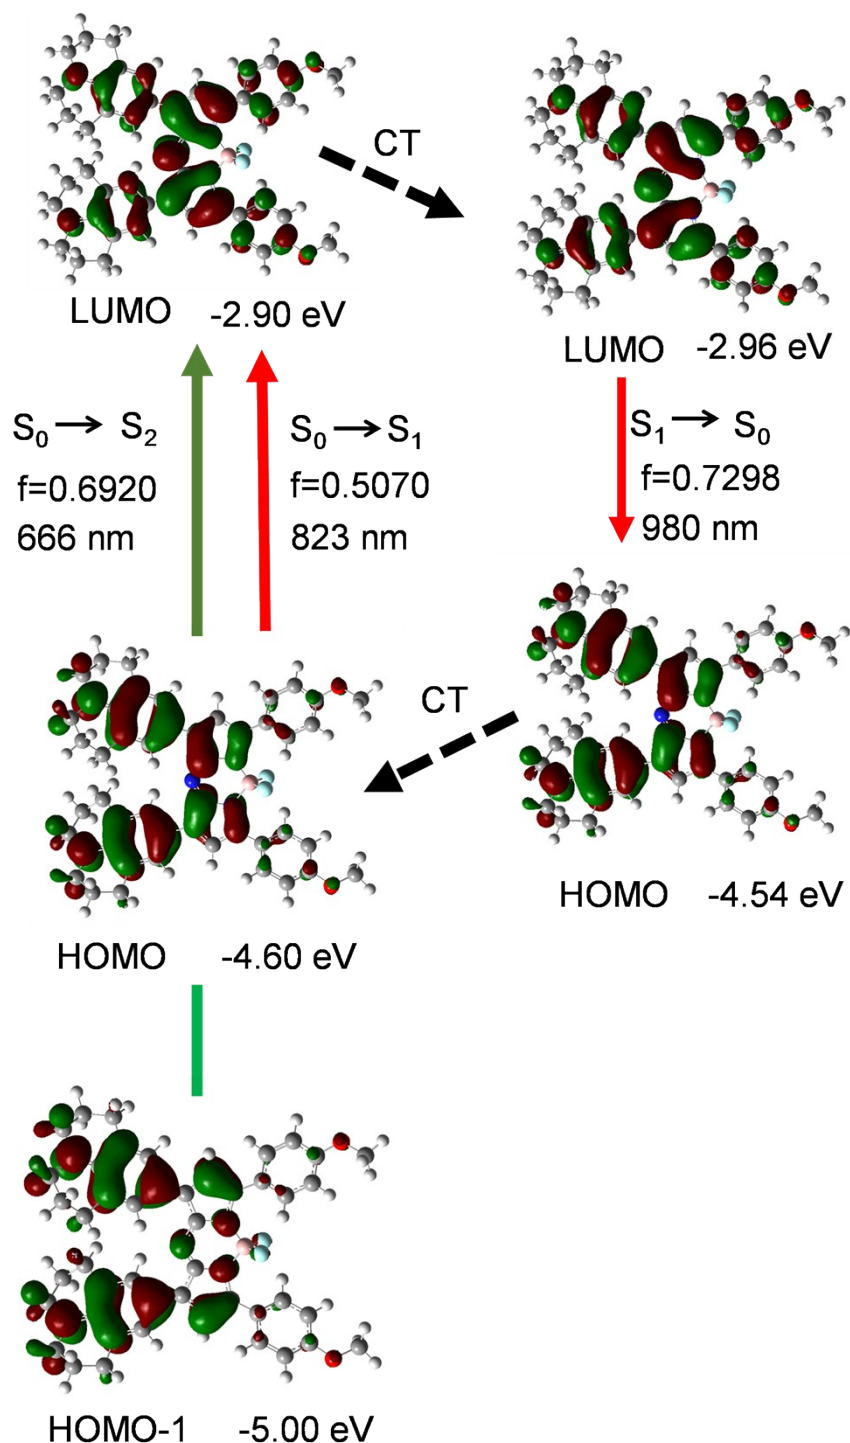

**Figure S3.** The frontier molecular orbitals (MOs) involved in the vertical excitation (UV-vis absorption) and emission of **NJ1060**. Water was employed as the solvent for the DFT calculations. The vertical excitation related calculations are based on the optimized ground state geometry ( $S_0$  state), the emission related calculations were based on the optimized excited state ( $S_1$  state), at the B3LYP/6-31G(d)/level using Gaussian 09W. CT stands for conformation transformation. Excitation and radiative processes are marked as solid lines and the non-radiative processes are marked by dotted lines.

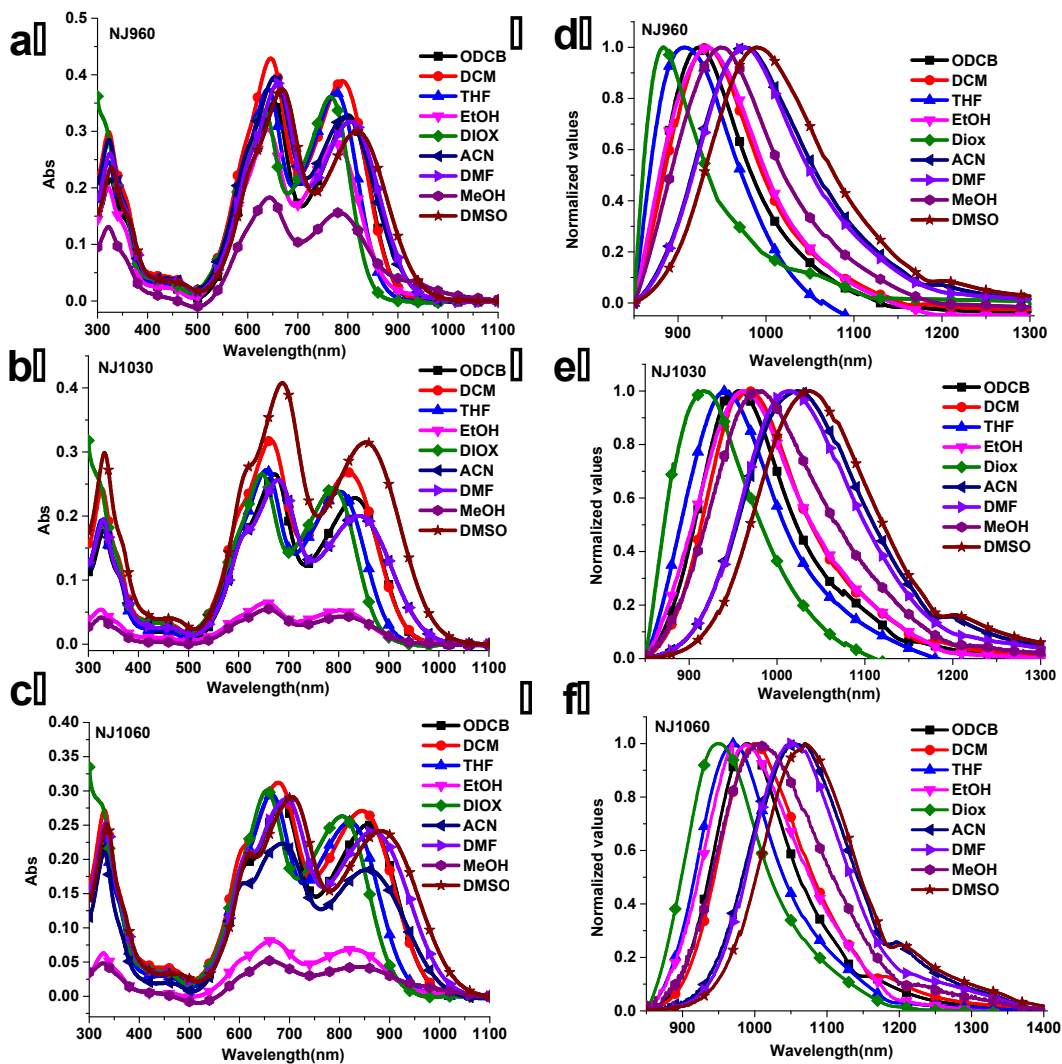

**Figure S4.** The UV-Vis absorption spectra (a, b, c) and normalized fluorescence spectra (d, e, f) of **NJ960** (5  $\mu\text{M}$ ), **NJ1030** (5  $\mu\text{M}$ ) and **NJ1060** (5  $\mu\text{M}$ ) in various organic solvents (ODCB: 1,2-Dichlorobenzene, DCM: dichloromethane, THF: Tetrahydrofuran, EtOH: Ethanol, DIOX: 1,4-Dioxane, ACN: Acetonitrile, DMF: N,N-Dimethylformamide, MeOH: Methanol, DMSO: Dimethyl sulfoxide). The excitation wavelength is at 808 nm.

**Table S3.** The photophysical characterization of **NJ960**, **NJ1030**, **NJ1060** in various organic solvents .

| Compound      | Solvent | $\lambda_{\text{abs(max)}} \text{ (nm)}$ | $\epsilon \text{ (cm}^{-1}\cdot\text{M}^{-1}\text{)}$ | $\lambda_{\text{em}} \text{ (nm)}$ | Stokes shift/nm |
|---------------|---------|------------------------------------------|-------------------------------------------------------|------------------------------------|-----------------|
| <b>NJ960</b>  | ODCB    | 804                                      | 689000                                                | 924                                | 123             |
|               | DCM     | 788                                      | 817000                                                | 933                                | 145             |
|               | THF     | 776                                      | 775000                                                | 907                                | 131             |
|               | EtOH    | 776                                      | 586000                                                | 933                                | 157             |
|               | DIOX    | 765                                      | 758000                                                | 883                                | 118             |
|               | ACN     | 801                                      | 327000                                                | 976                                | 180             |
|               | DMF     | 796                                      | 665000                                                | 976                                | 172             |
|               | MeOH    | 781                                      | 327000                                                | 948                                | 167             |
|               | DMSO    | 818                                      | 630000                                                | 989                                | 171             |
| <b>NJ1030</b> | ODCB    | 832                                      | 495000                                                | 956                                | 124             |
|               | DCM     | 820                                      | 582000                                                | 968                                | 148             |
|               | THF     | 802                                      | 517000                                                | 941                                | 139             |
|               | EtOH    | 802                                      | 115000                                                | 963                                | 161             |
|               | DIOX    | 786                                      | 528000                                                | 918                                | 132             |
|               | ACN     | 839                                      | 434000                                                | 1023                               | 184             |
|               | DMF     | 839                                      | 434000                                                | 1012                               | 173             |
|               | MeOH    | 808                                      | 93000                                                 | 978                                | 170             |
|               | DMSO    | 854                                      | 684000                                                | 1036                               | 182             |
| <b>NJ1060</b> | ODCB    | 856                                      | 564000                                                | 989                                | 133             |
|               | DCM     | 844                                      | 608000                                                | 1002                               | 158             |
|               | THF     | 820                                      | 573000                                                | 976                                | 156             |
|               | EtOH    | 825                                      | 155000                                                | 969                                | 144             |
|               | DIOX    | 805                                      | 591000                                                | 948                                | 143             |
|               | ACN     | 855                                      | 415000                                                | 1056                               | 201             |
|               | DMF     | 867                                      | 541000                                                | 1005                               | 138             |
|               | MeOH    | 835                                      | 96000                                                 | 1006                               | 171             |
|               | DMSO    | 883                                      | 541000                                                | 1070                               | 187             |

(ODCB: 1,2-Dichlorobenzene, DCM: dichloromethane, THF: Tetrahydrofuran, EtOH: Ethanol, DIOX: 1,4-Dioxane, ACN: Acetonitrile, DMF: N,N-Dimethylformamide, MeOH: Methanol, DMSO: Dimethyl sulfoxide)

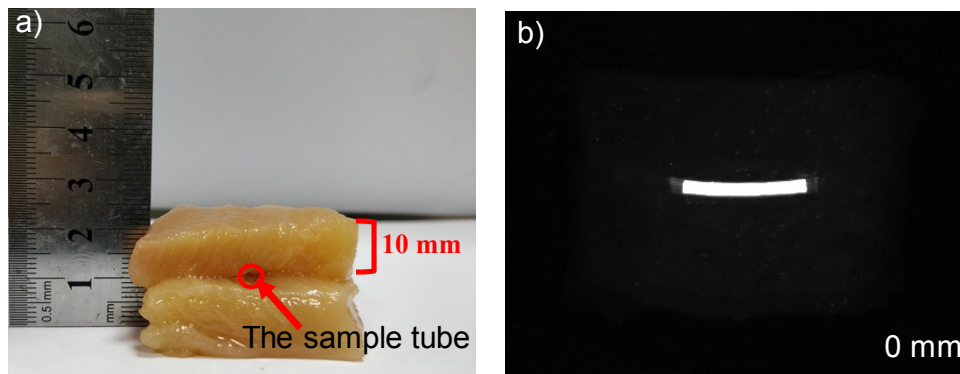

**Figure S5.** Chicken penetration model assay. (a) A model for the nuggets: the sample tube was covered 10 mm thickness of chicken. (b) The fluorescence image of tube with 0 mm thickness of chicken.

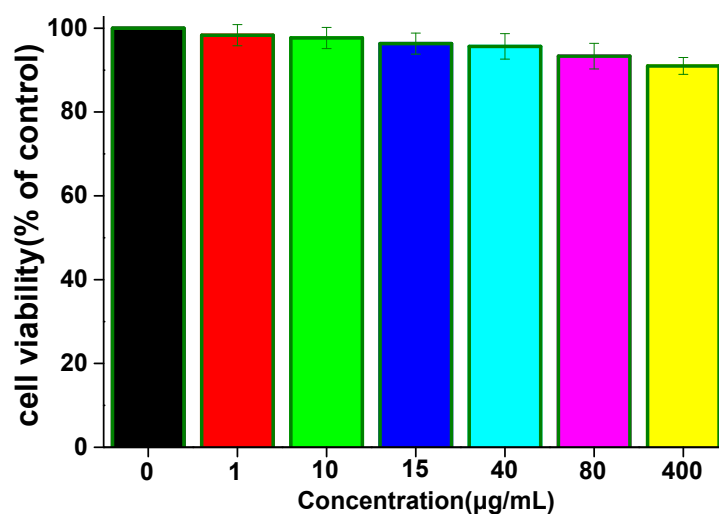

**Figure S6.** Cytotoxicity of different concentrations of NJ1060 NPs against HepG2 cells for 24 h.

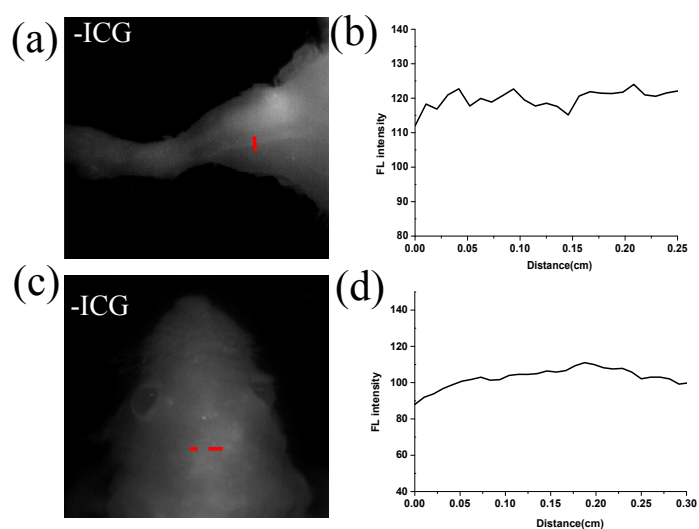

**Figure S7.** NIR-II images (ICG) of the mouse hind limb (a) and brain (c). The emission intensity profiles of a red line of interest in (a) (b) and (c) (d).



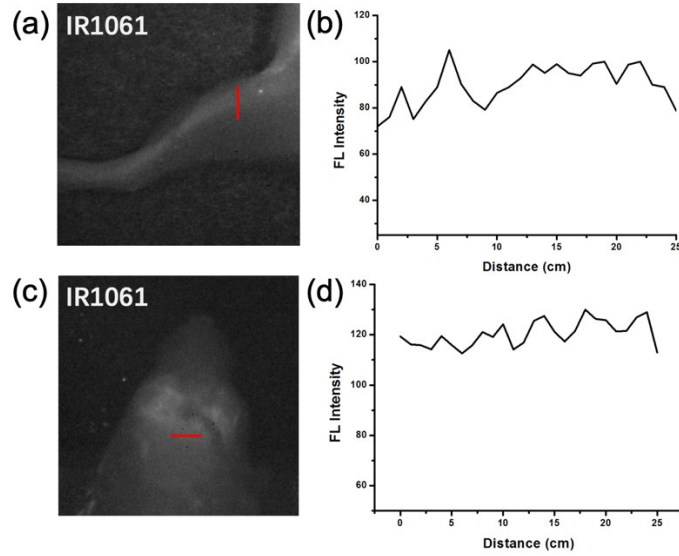

**Figure S8.** NIR-II images (IR1061) of the mouse hind limb (a) and brain (c). The emission intensity profiles of a red line of interest in a (b) and c (d).

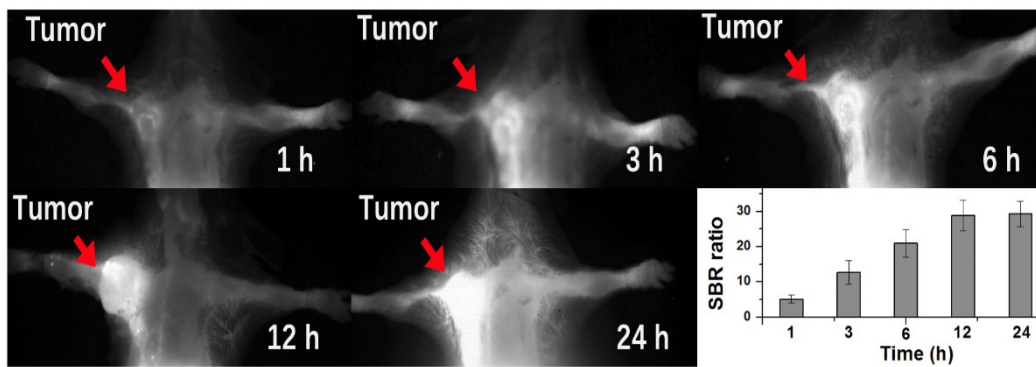

**Figure S9:** The NIR-II images (IR1061) of the 4T1 tumor at different time points after tail-vein injection of **NJ1060** NPs under an 808 nm laser excitation and SBR ratios of the tumor at different time.



## 12. <sup>1</sup>H, <sup>13</sup>C-NMR and HRMS Spectra.

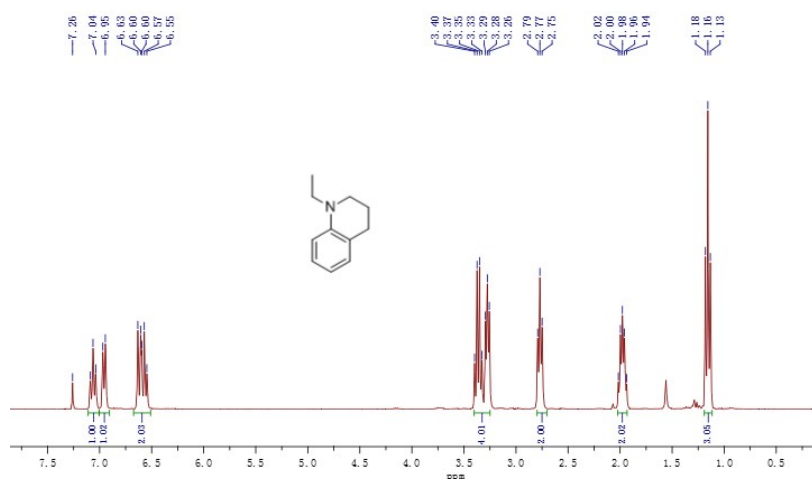

<sup>1</sup>H NMR spectrum of **1**

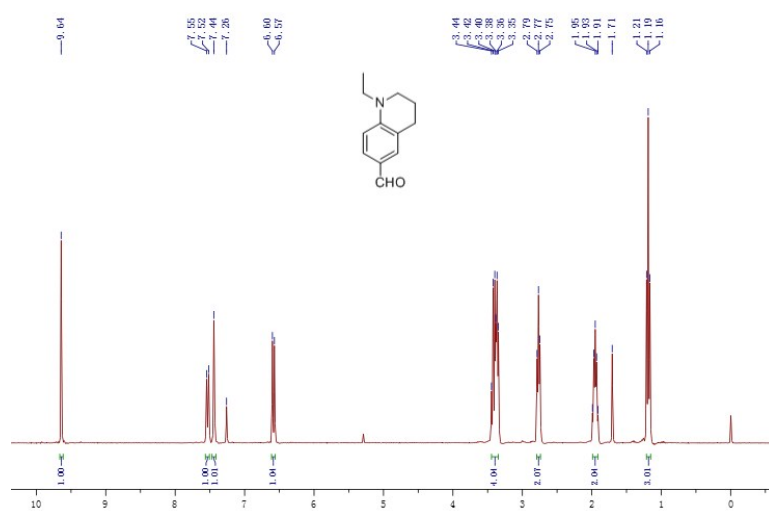

<sup>1</sup>H NMR spectrum of **2b**

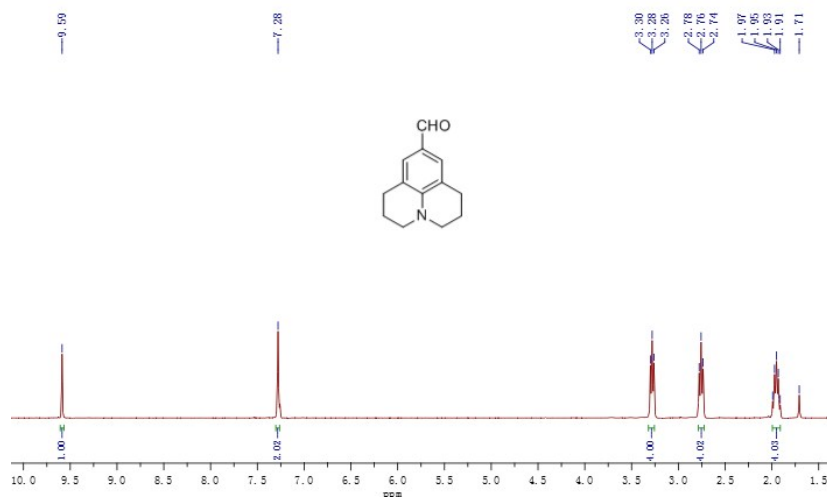

<sup>1</sup>H NMR spectrum of **2c**

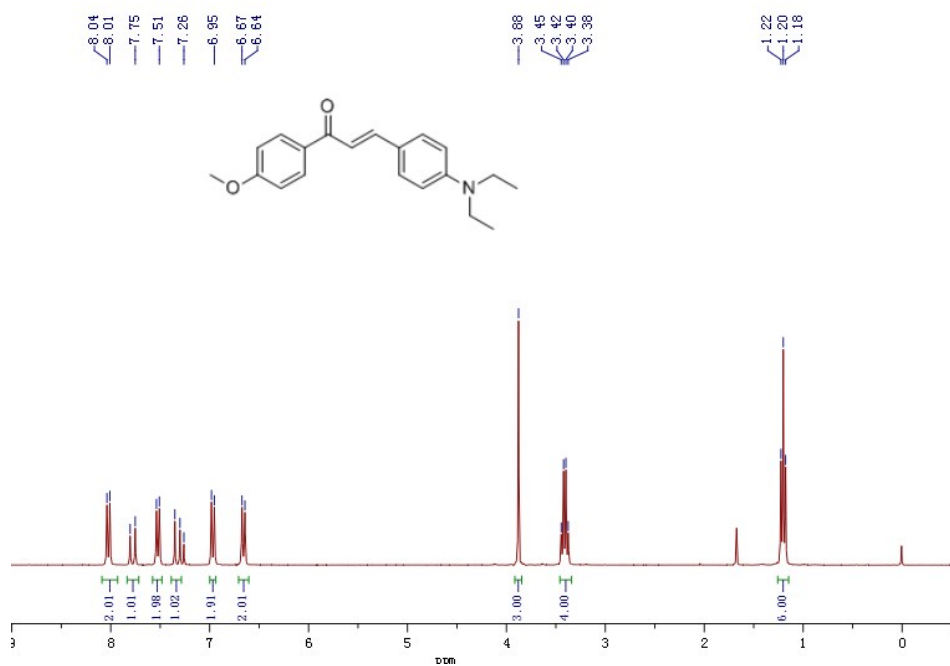

<sup>1</sup>H NMR spectrum of 3a

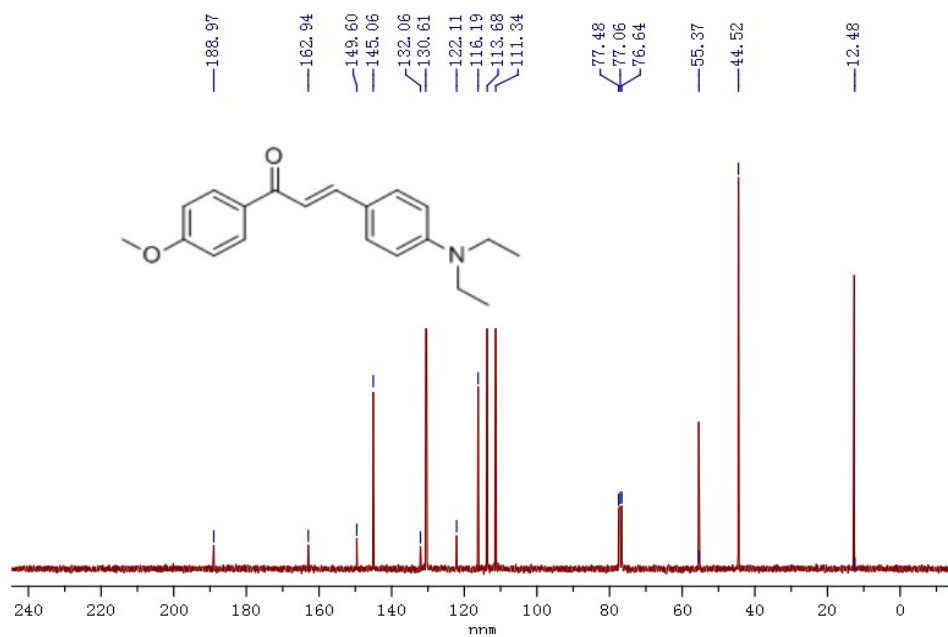

<sup>13</sup>C NMR spectrum of 3a

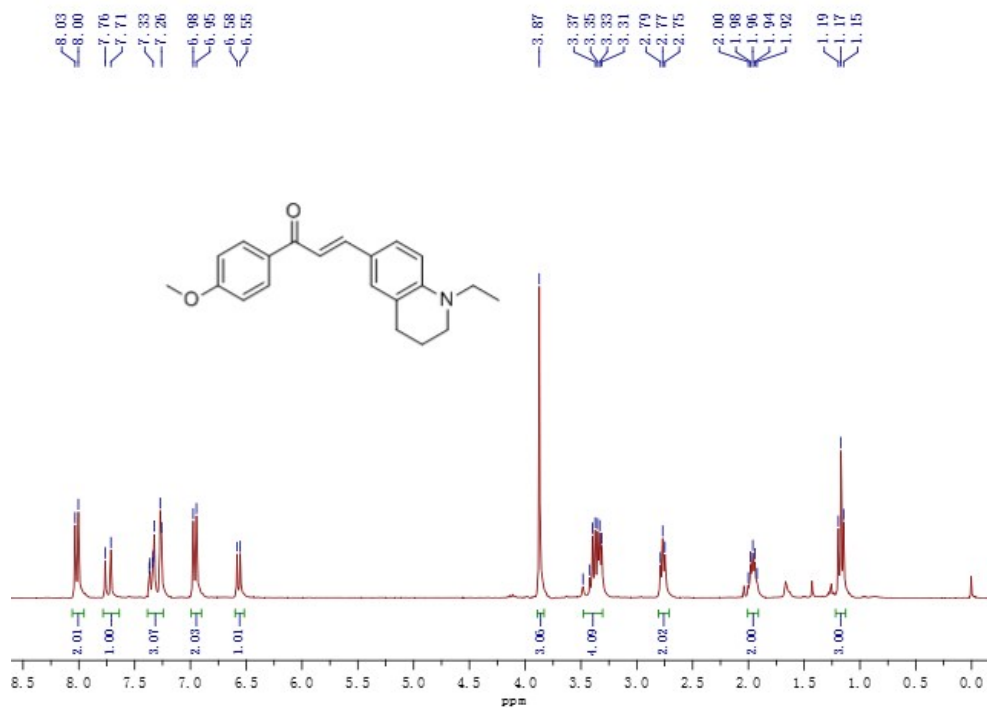

<sup>1</sup>H NMR spectrum of **3b**

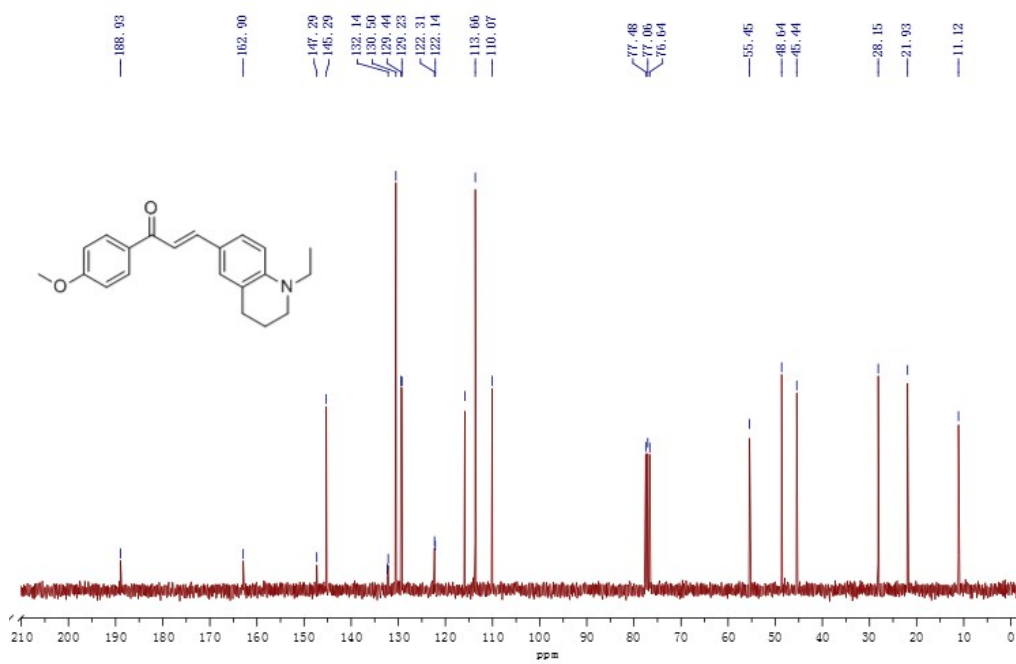

<sup>13</sup>C NMR spectrum of **3b**

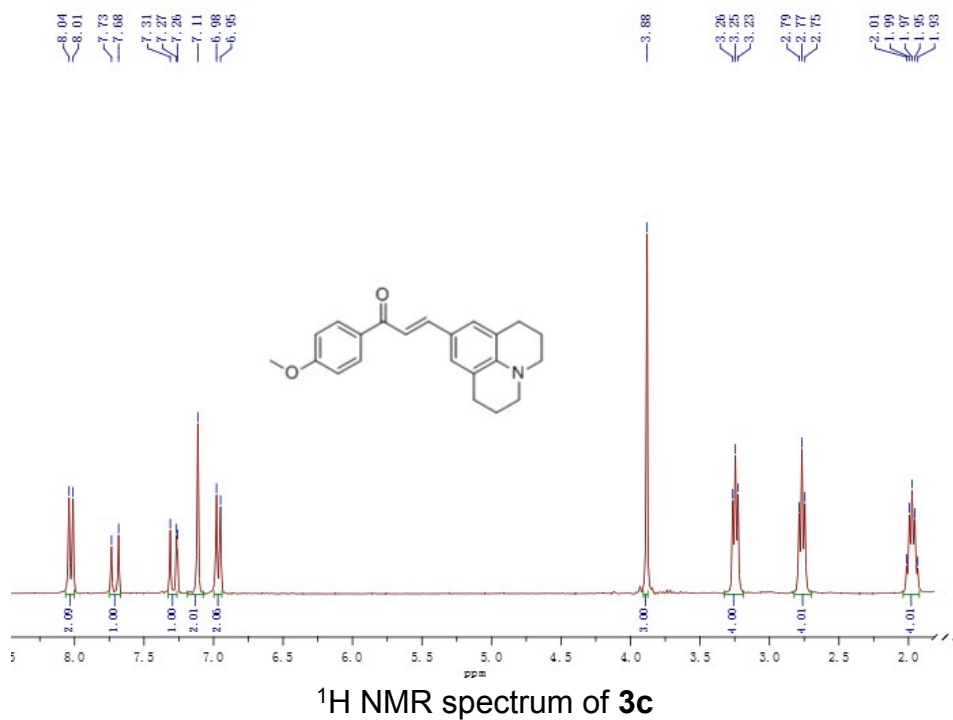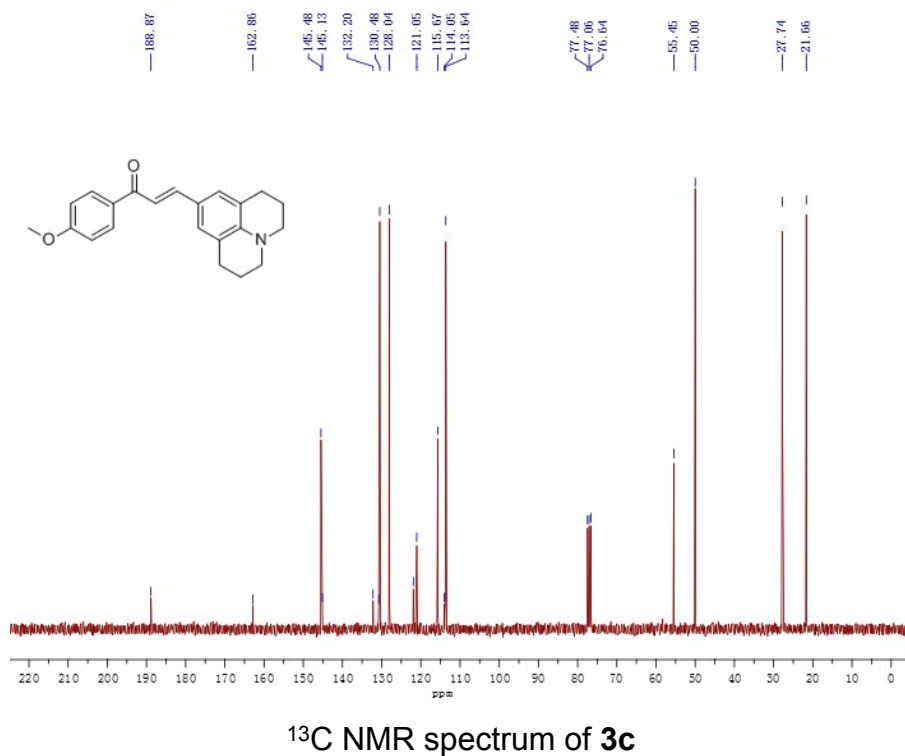

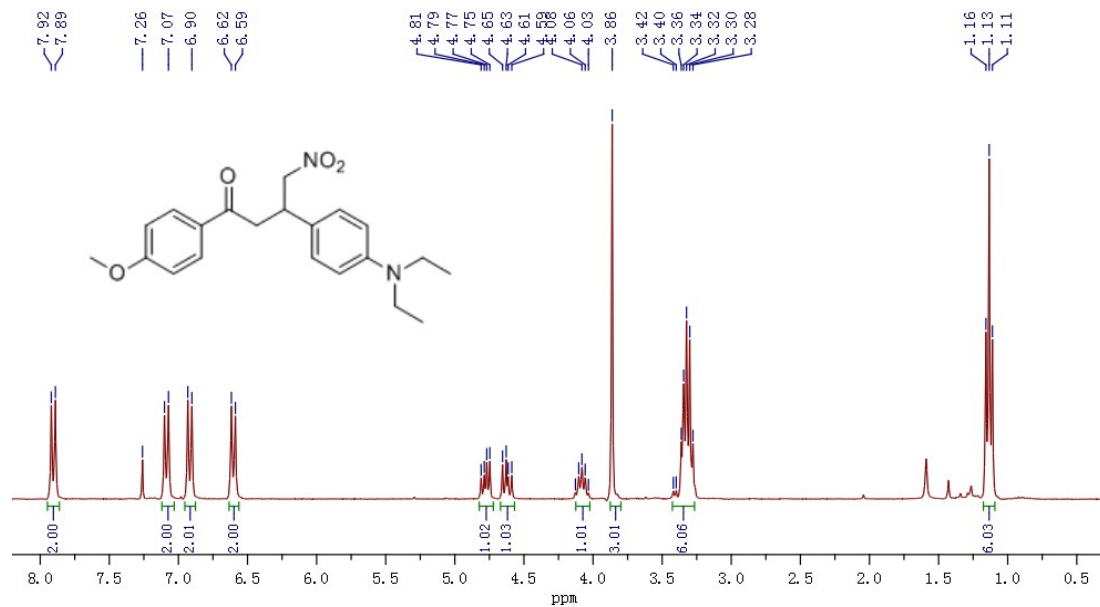

<sup>1</sup>H NMR spectrum of 4a

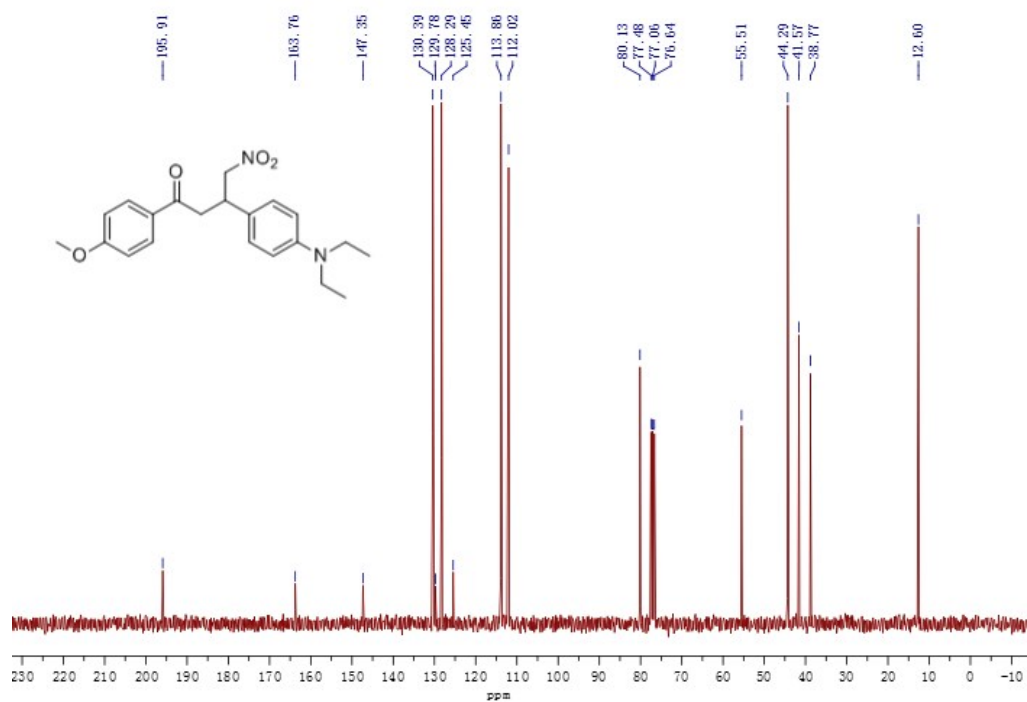

<sup>13</sup>C NMR spectrum of 4a

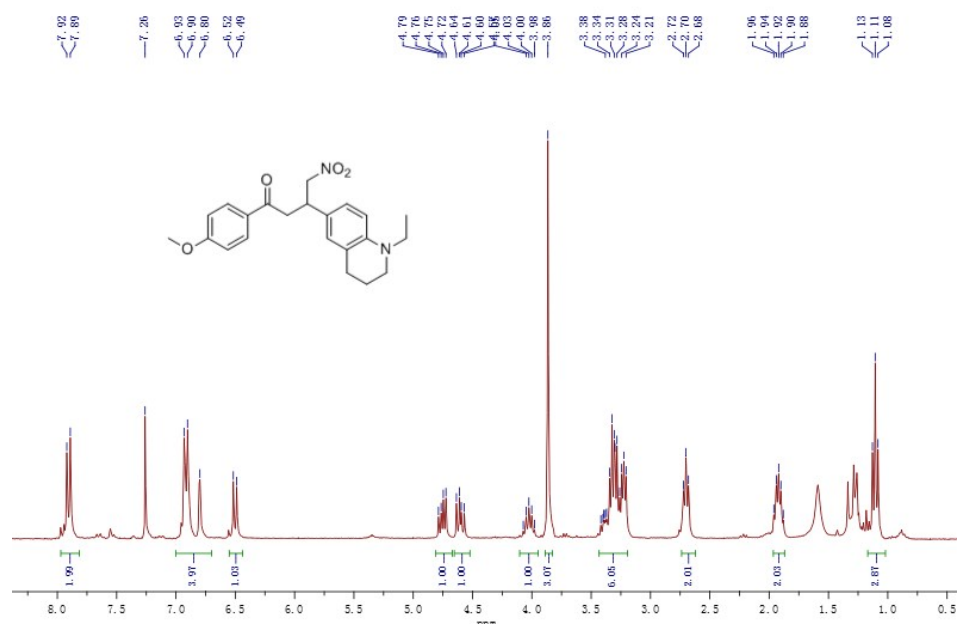

<sup>1</sup>H NMR spectrum of **4b**

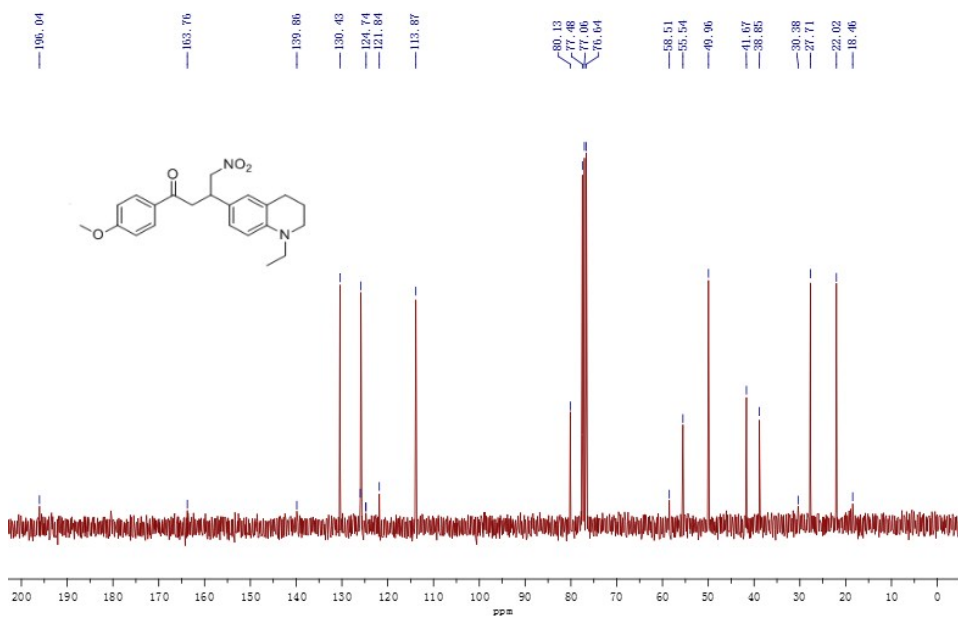

<sup>13</sup>C NMR spectrum of **4c**

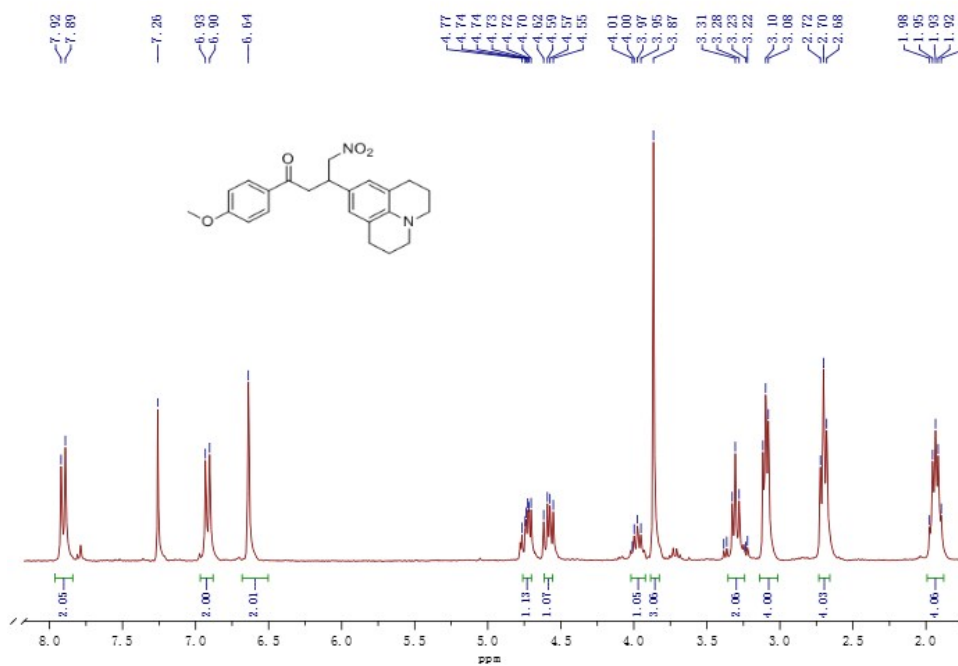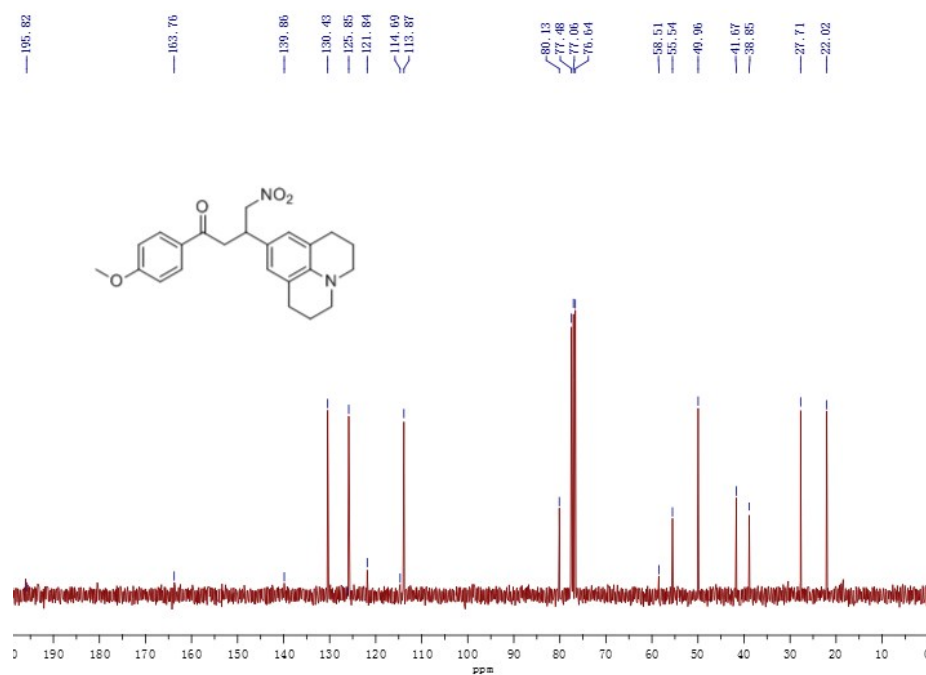

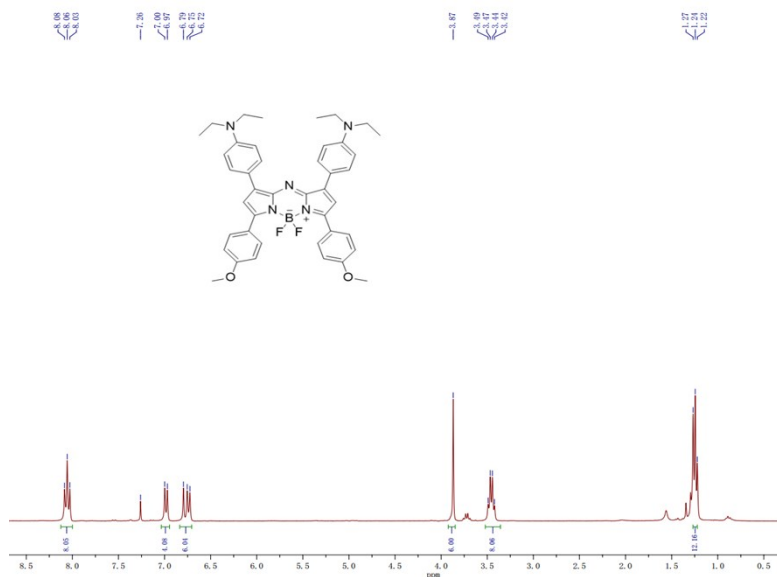

<sup>1</sup>H NMR spectrum of NJ960

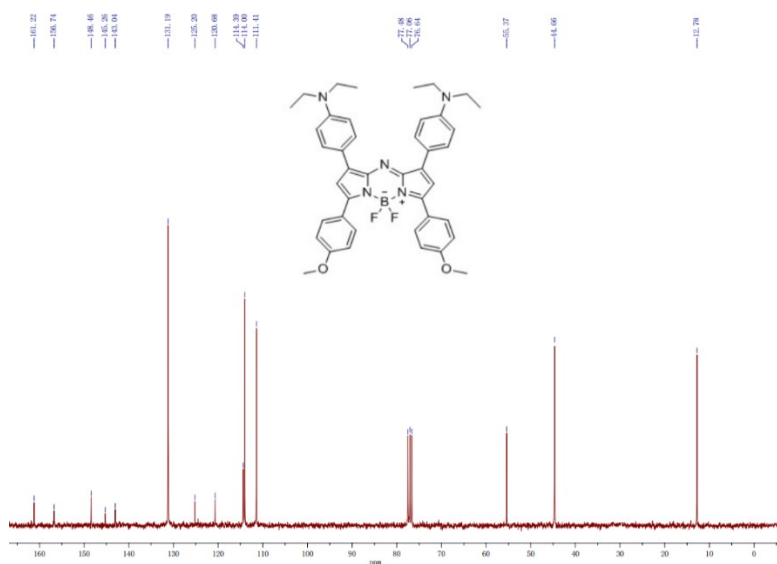

<sup>13</sup>C NMR spectrum of NJ960

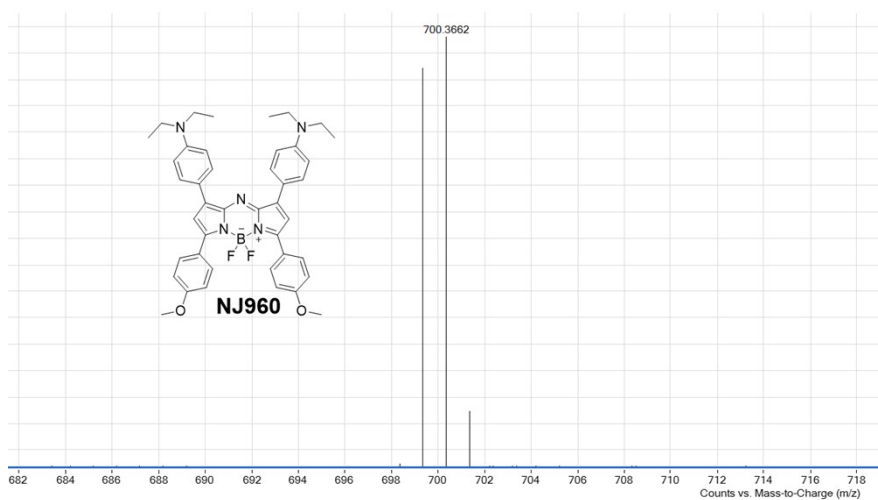

HRMS of NJ960



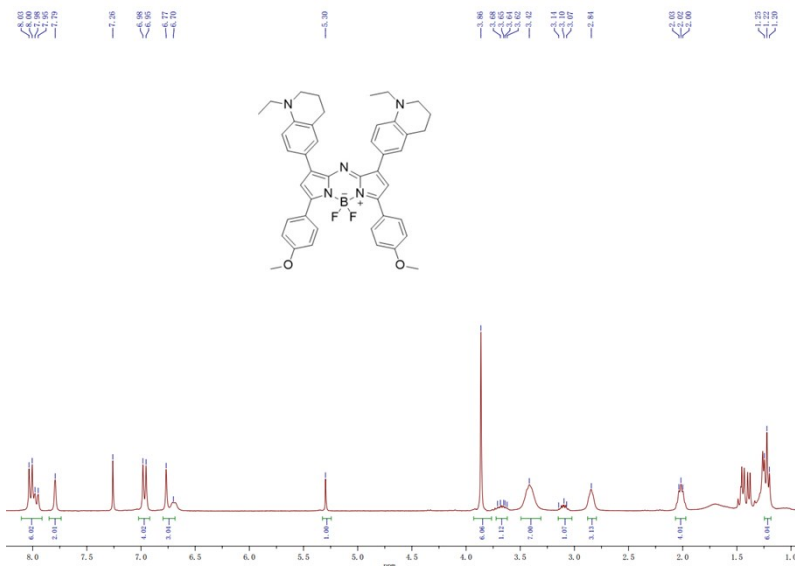

<sup>1</sup>H NMR spectrum of NJ1030

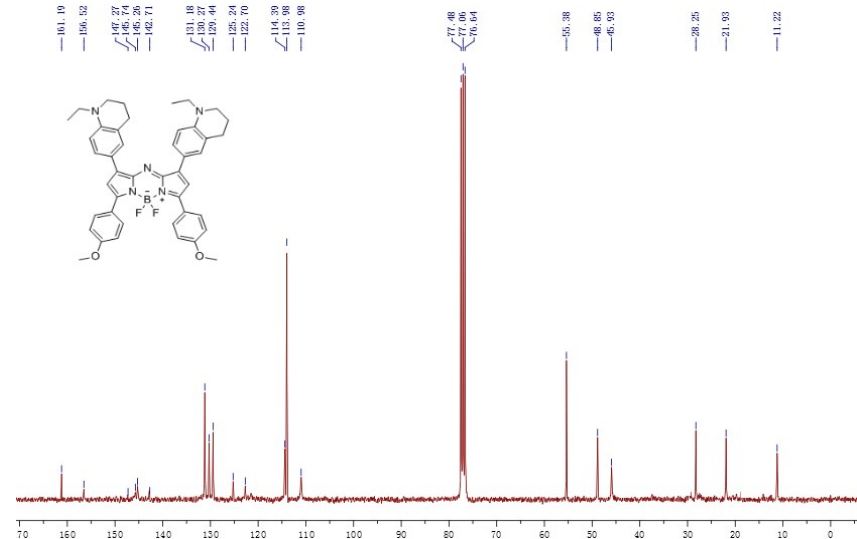

<sup>13</sup>C NMR spectrum of NJ1030

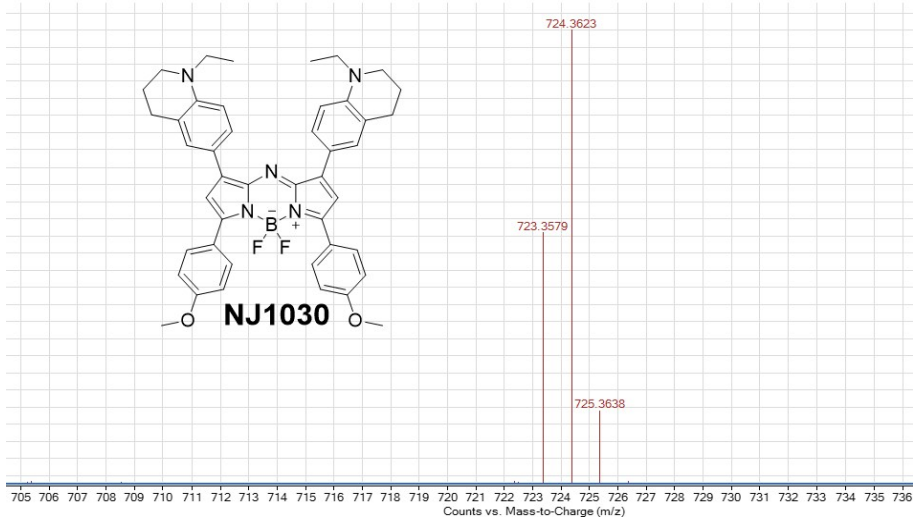

HRMS of NJ1030

8.27, 8.25, 7.99, 7.96, 7.26, 6.97, 6.94, 6.72, 3.86, 3.27, 2.77, 2.75, 2.19, 2.17

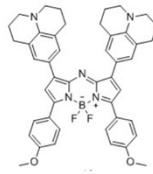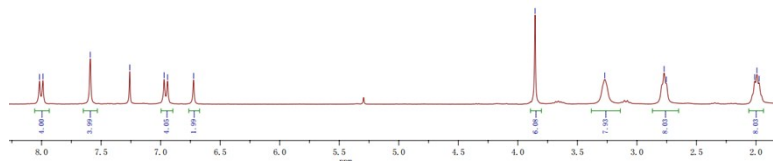

<sup>1</sup>H NMR spectrum of NJ1060.

161.04, 156.04, 145.21, 143.95, 143.18, 131.12, 128.88, 125.37, 120.85, 114.39, 113.90, 77.48, 77.06, 76.64, 55.36, 50.18, 28.07, 21.87

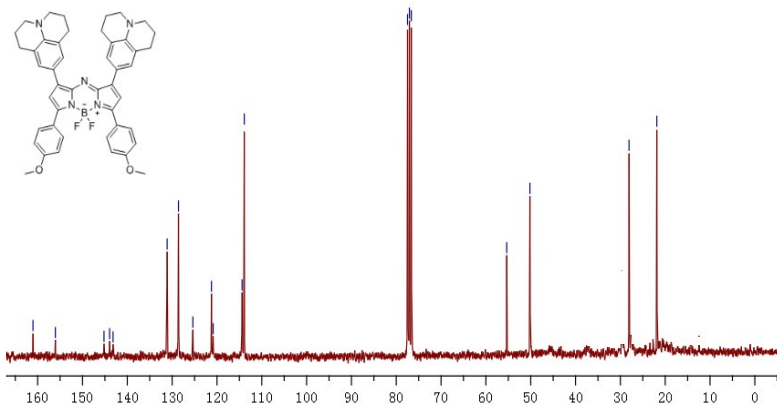

<sup>13</sup>C NMR spectrum of NJ1060

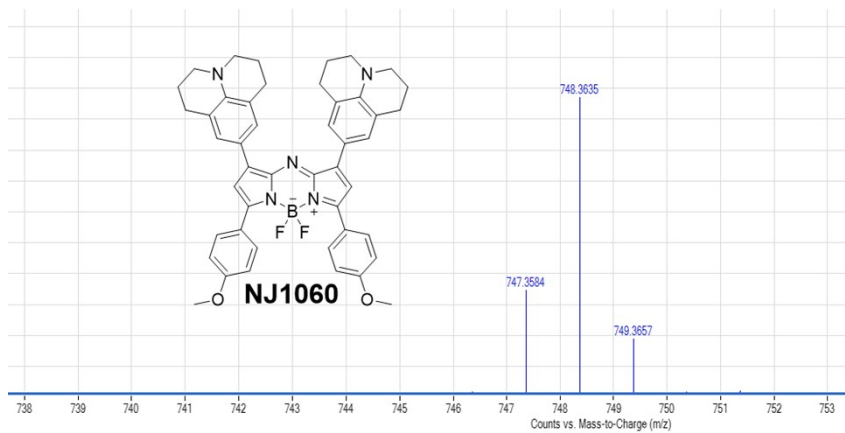

HRMS of NJ1060

### 13. Reference

- 1 P. Proposito, M. Casalboni, F. De Matteis, M. Glasbeek, A. Quatela, E. van Veldhoven, H. Zhang. *J. Lumin.* 2001, **94**, 641-644.
- 2 R. Pizzoferrato, M. Casalboni, F. De Matteis, P. Proposito. *J. Lumin.* 2000, **87**, 748-750.
- 3 B. Li, L. Lu, M. Zhao, Z. Lei, F. Zhang, *Angew. Chem. Int. Ed.* 2018, **57**, 7483-7487.
- 4 S. Hatami, C. Würth, M. Kaiser, S. Leubner, S. Gabriel, L. Bahrig, V. Lesnyak, J. Pauli, N. Gaponik, A. Eychmüller, *Nanoscale* 2015, **7**, 133-143.
- 5 D. A. Cosco, J. R. Caram, O. T. Bruns, D. Franke, R. A. Day, E. P. Farr, M. G. Bawendi, E. M. Sletten, *Angew. Chem. Int. Ed.* 2017, **56**, 13126-13129.
- 6 A. L. Antaris, H. Chen, K. Cheng, Y. Sun, G. Hong, C. Qu, S. Diao, Z. Deng, X. Hu, B. Zhang, X. Zhang, O. K. Yaghi, Z. R. Alamparambil, X. Hong, Z. Cheng and H. Dai. *Nat. Mater.* 2016, **15**, 235-242.
- 7 Y. Sun, Ch. Qu, H. Chen, M. He, Ch. Tang, K. Shou, S. Hong, M. Yang, Y. Jiang, B. Ding, Y. Xiao, L. Xing, X. Hong and Z. Cheng. *Chem. Sci.* 2016, **7**, 6203-6207.
